# Supplementary material for: Immunogenicity and safety of a booster dose of a quadrivalent meningococcal tetanus toxoid-conjugate vaccine (MenACYW-TT) in adolescents and adults: a Phase III randomized study
Source: PubMed Central journal article supplement (PMC7482862; doi:10.1080/21645515.2020.1733867), 2020-03-25
Supplement: KHVI_A_1733867_SM2659.pdf [file KHVI_A_1733867_SM2659.pdf]

## **Supplemental Materials**

### **MET56 Investigators**

Donald Brandon, San Diego, CA, USA; Marilou Cruz, Downey, CA, USA; Matthew Davis, Rochester, NY, USA; Cheryl Duffy, Hermitage, PA, USA; John Ervin, Kansas City, MO, USA; Bradley Fox, Erie, PA, USA; Neil Fraser, Troy, MI, USA; Nicole George, Fairfield, OH, USA; Hoadley Harris, Fargo, ND, USA; Jorge Jaramillo, La Puente, CA, USA; William Johnston, Birmingham, AL, USA; Katie Julien, South Jordan, UT; Joseph Leader, Woburn, MA, USA; Christopher Peltier, Cincinnati, OH, USA; James Peterson, Salt Lake City, UT, USA; William Randall, Dayton, OH; Kevin Rouse, Jonesboro, AR; Stephen Russell, Lincoln, NE, USA; Clifford Seyler, Tullahoma, TN, USA; Julie Shepard, Dayton, OH, USA; Gerald Shockey, Mesa, AZ, USA; Michael Simon, Nicholasville, KY, USA; Craig Spiegel, Bridgeton, MO, USA; Patrick Yassini, San Diego, CA, USA; Jennifer Kay, Council Bluffs, IA, USA; Claude Ashley, Dothan, AL, USA; Carmen Deseda, San Juan, Puerto Rico.

**Supplementary Table 1.** Geometric means of hSBA titers at baseline and Day 6

|           |       | MenACYW-TT<br>(N=55) |      |             | MCV4-DT<br>(N=62) |      |              |
|-----------|-------|----------------------|------|-------------|-------------------|------|--------------|
| Time      |       |                      |      |             |                   |      |              |
| Serogroup | Point | M                    | GMT  | (95% CI)    | M                 | GMT  | (95% CI)     |
| A         | Day 0 | 55                   | 12.1 | (8.8, 16.7) | 62                | 19.6 | (14.1, 27.1) |
|           | Day 6 | 55                   | 173  | (102, 294)  | 62                | 226  | (141, 363)   |
| C         | Day 0 | 55                   | 8.00 | (5.6, 11.4) | 62                | 11.4 | (8.01, 16.3) |
|           | Day 6 | 55                   | 334  | (191, 583)  | 62                | 448  | (277, 724)   |
| W         | Day 0 | 55                   | 8.00 | (6.1, 10.6) | 62                | 11.8 | (8.21, 17.1) |
|           | Day 6 | 55                   | 499  | (293, 850)  | 62                | 346  | (216, 555)   |
| Y         | Day 0 | 55                   | 6.30 | (4.4, 9.1)  | 62                | 9.67 | (6.5, 14.5)  |
|           | Day 6 | 55                   | 302  | (176, 516)  | 62                | 335  | (219, 512)   |

CI, confidence interval; hSBA, human complement serum bactericidal antibody assay; M, number of participants with valid serology results for the particular serogroup and time point; N, number of participants in the per-protocol analysis set

**Supplementary Table 2.** Proportion of participants achieving hSBA vaccine seroresponse<sup>a</sup> at Day 30, by age at time of booster dose

| Serogroup                  | MenACYW-TT<br>(N=384) |      |              | MCV4-DT<br>(N=389) |      |              |
|----------------------------|-----------------------|------|--------------|--------------------|------|--------------|
|                            | n/M                   | %    | (95% CI)     | n/M                | %    | (95% CI)     |
| <b>≥15 to &lt;18 years</b> |                       |      |              |                    |      |              |
| A                          | 183/201               | 91.0 | (86.2, 94.6) | 181/201            | 90.0 | (85.1, 93.8) |
| C                          | 196/201               | 97.5 | (94.3, 99.2) | 190/201            | 94.5 | (90.4, 97.2) |
| W                          | 197/201               | 98.0 | (95.0, 99.5) | 188/201            | 93.5 | (89.2, 96.5) |
| Y                          | 198/201               | 98.5 | (95.7, 99.7) | 195/201            | 97.0 | (93.6, 98.9) |
| <b>≥18 years</b>           |                       |      |              |                    |      |              |
| A                          | 171/183               | 93.4 | (88.8, 96.6) | 158/188            | 84.0 | (78.0, 89.0) |
| C                          | 177/183               | 96.7 | (93.0, 98.8) | 167/188            | 88.8 | (83.4, 93.0) |
| W                          | 180/183               | 98.4 | (95.3, 99.7) | 165/188            | 87.8 | (82.2, 92.1) |
| Y                          | 176/183               | 96.2 | (92.3, 98.4) | 177/188            | 94.1 | (89.8, 97.0) |

CI, confidence interval; hSBA human complement serum bactericidal antibody assay; n, number of subjects with titers that meet the hSBA vaccine seroresponse criteria; M, number of participants with valid serology results for the particular serogroup and time point; N, number of participants in the per-protocol analysis set

<sup>a</sup>Vaccine seroresponse: titer is <1:8 at baseline with post-vaccination titer ≥1:16 or titer is ≥1:8 at baseline with a ≥4-fold increase at post-vaccination

**Supplementary Table 3.** Proportion of participants achieving hSBA vaccine seroresponse<sup>a</sup> at Day 30, by time elapsed since priming vaccination

| Serogroup               | MenACYW-TT<br>(N=384) |      |              | MCV4-DT<br>(N=389) |      |              |
|-------------------------|-----------------------|------|--------------|--------------------|------|--------------|
|                         | n/M                   | %    | (95% CI)     | n/M                | %    | (95% CI)     |
| <b>4 to &lt;7 years</b> |                       |      |              |                    |      |              |
| A                       | 254/276               | 92.0 | (88.2, 94.9) | 250/281            | 89.0 | (84.7, 92.4) |
| C                       | 269/276               | 97.5 | (94.8, 99.0) | 262/281            | 93.2 | (89.6, 95.9) |
| W                       | 272/276               | 98.6 | (96.3, 99.6) | 256/281            | 91.1 | (87.1, 94.2) |
| Y                       | 271/276               | 98.2 | (95.8, 99.4) | 274/281            | 97.5 | (94.9, 99.0) |
| <b>7 to 10 years</b>    |                       |      |              |                    |      |              |
| A                       | 100/108               | 92.6 | (85.9, 96.7) | 89/108             | 82.4 | (73.9, 89.1) |
| C                       | 104/108               | 96.3 | (90.8, 99.0) | 95/108             | 88.0 | (80.3, 93.4) |
| W                       | 105/108               | 97.2 | (92.1, 99.4) | 97/108             | 89.8 | (82.5, 94.8) |
| Y                       | 103/108               | 95.4 | (89.5, 98.5) | 98/108             | 90.7 | (83.6, 95.5) |

CI, confidence interval; hSBA, human complement serum bactericidal antibody assay; n, number of subjects with titers that meet the hSBA vaccine seroresponse criteria; M, number of participants with valid serology results for the particular serogroup and time point; N, number of participants in the per-protocol analysis set

<sup>a</sup>Vaccine seroresponse: titer is <1:8 at baseline with post-vaccination titer  $\geq$ 1:16 or titer is  $\geq$ 1:8 at baseline with a  $\geq$ 4-fold increase at post-vaccination

**Supplementary Table 4.** Proportion of participants achieving hSBA vaccine seroresponse<sup>a</sup> at Day 30, by type of MCV4 received at priming (MCV4-DT or MCV4-CRM)

| Serogroup       | MenACYW-TT<br>(N=384) |       |               | MCV4-DT<br>(N=389) |      |              |
|-----------------|-----------------------|-------|---------------|--------------------|------|--------------|
|                 | n/M                   | %     | (95% CI)      | n/M                | %    | (95% CI)     |
| <b>MCV4-DT</b>  |                       |       |               |                    |      |              |
| A               | 303/327               | 92.7  | (89.3, 95.2)  | 298/340            | 87.6 | (83.7, 91.0) |
| C               | 317/327               | 96.9  | (94.4, 98.5)  | 311/340            | 91.5 | (88.0, 94.2) |
| W               | 322/327               | 98.5  | (96.5, 99.5)  | 306/340            | 90.0 | (86.3, 93.0) |
| Y               | 318/327               | 97.2  | (94.8, 98.7)  | 325/340            | 95.6 | (92.8, 97.5) |
| <b>MCV4-CRM</b> |                       |       |               |                    |      |              |
| A               | 43/48                 | 89.6  | (77.3, 96.5)  | 31/39              | 79.5 | (63.5, 90.7) |
| C               | 48/48                 | 100.0 | (92.6, 100.0) | 36/39              | 92.3 | (79.1, 98.4) |
| W               | 47/48                 | 97.9  | (88.9, 99.9)  | 37/39              | 94.9 | (82.7, 99.4) |
| Y               | 48/48                 | 100.0 | (92.6, 100.0) | 37/39              | 94.9 | (82.7, 99.4) |

CI, confidence interval; hSBA, human complement serum bactericidal antibody assay; n, number of subjects with titers that meet the hSBA vaccine seroresponse criteria; M, number of participants with valid serology results for the particular serogroup and time point; N, number of participants in the per-protocol analysis set

<sup>a</sup>Vaccine seroresponse: titer is <1:8 at baseline with post-vaccination titer  $\geq$ 1:16 or titer is  $\geq$ 1:8 at baseline with a  $\geq$ 4-fold increase at post-vaccination

**Supplementary Table 5.** Geometric means of rSBA titers at baseline and Day 30

|           |        | MenACYW-TT<br>(N=384) |       |                | MCV4-DT<br>(N=389) |      |               |
|-----------|--------|-----------------------|-------|----------------|--------------------|------|---------------|
|           |        | Time                  |       |                |                    |      |               |
| Serogroup | Point  | M                     | GMT   | (95% CI)       | M                  | GMT  | (95% CI)      |
| A         | Day 0  | 91                    | 1097  | (724, 1662)    | 100                | 1144 | (812, 1613)   |
|           | Day 30 | 91                    | 10859 | (8844, 13333)  | 100                | 6608 | (5410, 8071)  |
| C         | Day 0  | 91                    | 15.2  | (9.38, 24.5)   | 100                | 9.13 | (5.90, 14.1)  |
|           | Day 30 | 91                    | 11898 | (9425, 15021)  | 100                | 2665 | (1934, 3672)  |
| W         | Day 0  | 91                    | 141   | (74.3, 269)    | 100                | 145  | (85.0, 247)   |
|           | Day 30 | 91                    | 21227 | (17199, 26200) | 100                | 9410 | (7203, 12294) |
| Y         | Day 0  | 91                    | 84.2  | (45.7, 155)    | 100                | 52.7 | (29.0, 95.9)  |
|           | Day 30 | 91                    | 9468  | (7447, 12037)  | 100                | 3848 | (2778, 5331)  |

CI, confidence interval; hSBA, human complement serum bactericidal antibody assay; M, number of participants with valid serology results for the particular serogroup and time point; N, number of participants in the per-protocol analysis set

**Supplementary Table 6.** Participants with rSBA titers  $\geq 1:128$  at baseline and Day 30

| Serogroup | Time Point | MenACYW-TT<br>(N=384) |       |               | MCV4-DT<br>(N=389) |       |               |
|-----------|------------|-----------------------|-------|---------------|--------------------|-------|---------------|
|           |            | n/M                   | %     | (95% CI)      | n/M                | %     | (95% CI)      |
| A         | Day 0      | 84/91                 | 92.3  | (84.8, 96.9)  | 95/100             | 95.0  | (88.7, 98.4)  |
|           | Day 30     | 91/91                 | 100.0 | (96.0, 100.0) | 100/100            | 100.0 | (96.4, 100.0) |
| C         | Day 0      | 26/91                 | 28.6  | (19.6, 39.0)  | 23/100             | 23.0  | (15.2, 32.5)  |
|           | Day 30     | 91/91                 | 100.0 | (96.0, 100.0) | 98/100             | 98.0  | (93.0, 99.8)  |
| W         | Day 0      | 61/91                 | 67.0  | (56.4, 76.5)  | 70/100             | 70.0  | (60.0, 78.8)  |
|           | Day 30     | 91/91                 | 100.0 | (96.0, 100.0) | 100/100            | 100.0 | (96.4, 100.0) |
| Y         | Day 0      | 55/91                 | 60.4  | (49.6, 70.5)  | 54/100             | 54.0  | (43.7, 64.0)  |
|           | Day 30     | 91/91                 | 100.0 | (96.0, 100.0) | 98/100             | 98.0  | (93.0, 99.8)  |

CI, confidence interval; n, number of participants experiencing the endpoint; hSBA, human complement serum bactericidal antibody assay; M, number of participants with valid serology results for the particular serogroup and time point; N, number of participants in the per-protocol analysis set
